# Supplementary material for: Molecular analysis of the interaction of LCMV with its cellular receptor α-dystroglycan
Source: PubMed Central journal article supplement — J Cell Biol. 2001 Oct 15;155(2):301–10. doi: 10.1083/jcb.200104103 (PMC2198839; doi:10.1083/jcb.200104103), 2001-10-15
Supplement: jcellbiol_jcb.200104103_3.pdf [file jcellbiol_jcb.200104103_3.pdf]

## Construction of the DG deletion mutants

For the construction of the DG deletion mutants, the following cDNA fragments amplified by PCR on rabbit DG cDNA (Ibraghimov-Beskrovnaya et al., 1992) were inserted into DgDisplay: DGI (DH30-R168), FP-DGN1b (digested with HindIII and ScaI) and DGC1f-Fub (digested with FspI and SacI); DGD ( $\Delta$ C182-H315), FP-Dub (digested with HindIII and NaeI) and SmaI1119-XhoI1284 (derived from DGE); DGE ( $\Delta$ H30-A316), Euf-Eub (digested with XmaI and SacI); DGF ( $\Delta$ T317-P408), Fuf-Fub (digested with ApaI and NaeI) and Fnf-Fdb (digested with SmaI and SacI); DGG ( $\Delta$ G409-S485), Guf-Gnb (digested with XhoI and SmaI) and Fdf-Fdb (digested with NaeI and BamHI); and DGH ( $\Delta$ H30-S485), Huf-Fdb (digested with XmaI and MfeI). All deletion mutants were verified by double-strand DNA sequencing. Mutants DGD and DGE have the amino acid exchange A316G. All other manipulations resulted in silent mutations.

## Primers

FP: 5'-CCCACTGCTTACTGGCTT-3'  
 DGN1b: 5'-GGGCCAAGTACTCTGAGCCACGGCCAC-3'  
 DGC1f: 5'-GTGTGCGCAGCCTCTCCAGACCTGGGC-3'  
 Fub: 5'-TGTGGGGCCGGCATGGATCTGCCTTCGGAT-3'  
 Dub: 5'-GGCAGCGCCGGCAGACGCCGCCGCCTC-3'  
 Euf: 5'-AGGCAGATCCCCGGGACACCCACACCTGTCCTACTGCC-3'  
 Eub: 5'-GGCGTCCACCCTGTCGATGTGGTT-3'  
 Fuf: 5'-ATGGCCGGCCCCGGAAACGCC-3'  
 Fub: 5'-TGTGGGGCCGGCATGGATCTGCCTTCGGAT-3'  
 Fnf: 5'-ACCATTCCCGGGTACGTGGAGCCCACA-3'  
 Fdf: 5'-ACCACCGCCGGCGTCCCCCGGGGGA-3'  
 Fdb: 5'-GTCTGGCACCTCCGTGGGTGG-3'  
 Guf: 5'-CCTGTTCTTGGGAAGCCCACG-3'  
 Gnb: 5'-CACGTACCCGGGAATGGTCACCGTTGC-3'  
 Huf: 5'-ATCCGCACCACCCCGGGGGGTGCCCGCGGGGGA-3'

## Construction of $\alpha$ -DG-Fc fusion proteins

Using the expression construct IgG1FcpcDNA3 (Chen et al., 1996),  $\alpha$ -DG-Fc fusion proteins containing the following sequences of  $\alpha$ -DG were made: DGFc1, amino acids 30–181; DGFc2, amino acids 30–316; DGFc3, amino acids 30–408; DGFc4, amino acids 30–485; and full-length  $\alpha$ -DG-Fc, DGFc5, amino acids 30–653. For the construction of DGFc1-5, human IgG1FcpcDNA3 was digested first with BamHI (filled in with EcoPolI Klenow enzyme for DGFc1-4) and then digested with KpnI. The following cDNA fragments generated by PCR were inserted into human IgG1FcpcDNA3 digested with BamHI and KpnI: DGFc1, FP-Dub (digested with PflMI and NaeI); DGFc2, Fuf-Fub (digested with ApaI and NaeI); DGFc3, Guf-Gnb (digested with XhoI and SmaI); DGFc4, Guf-Gub (digested by XhoI and ScaI); and DGFc5, Fdf-DGFcb (digested with SacI and BamHI).

## Primers

Gub: 5'-GGGCACAGTACTGGTGGTGGTGC GGATACG-3'  
 DGFcb: 5'-CGGAGGATCCCCCGGGGTGATGTTCTGCAG-3'

## Detection of LCMV ARM53b and clone-13 in spleen tissue by in situ hybridization

Fig. 4, showing the detection of LCMV ARM53b and clone-13 by in situ hybridization in spleen tissue with hematoxylin-eosin counter staining, has been modified from Borrow et al. (Borrow, P., C.F. Evans, and M.B. Oldstone. 1995. *J. Virol.* 69: 1059–1070).
